# Supplementary material
Source: PubMed Central journal article supplement (PMC5833300)

Supplemental Fig. 1

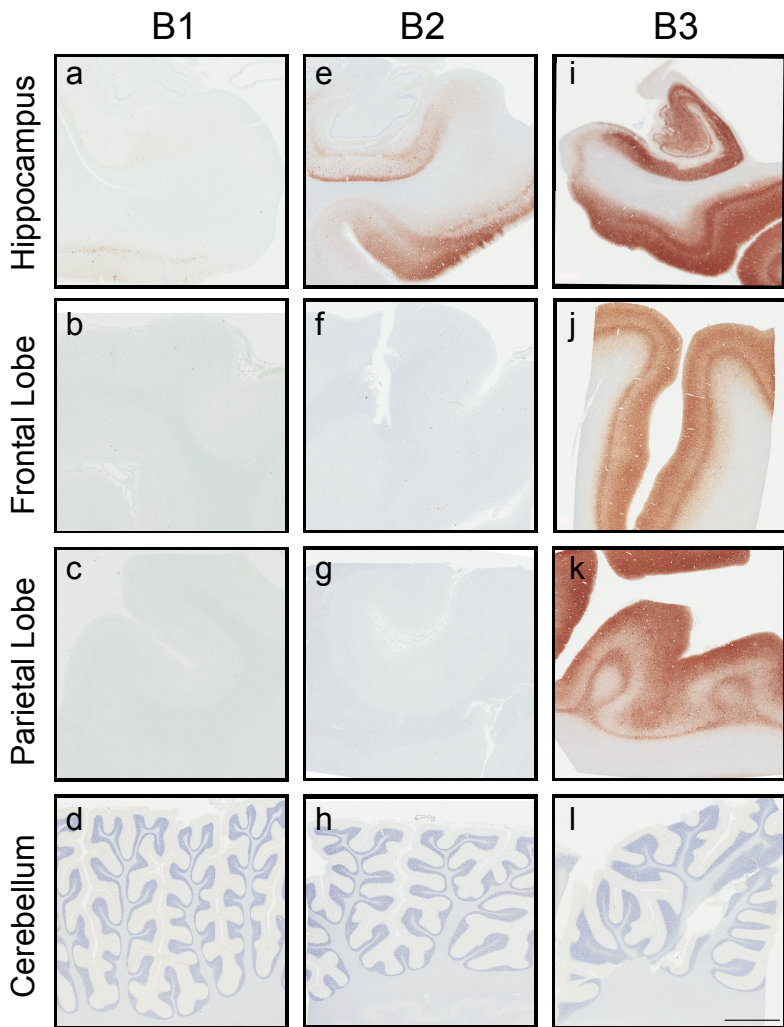

Supplement: NIHMS916392-supplement-1.pdf [file NIHMS916392-supplement-1.pdf]

Figure S2

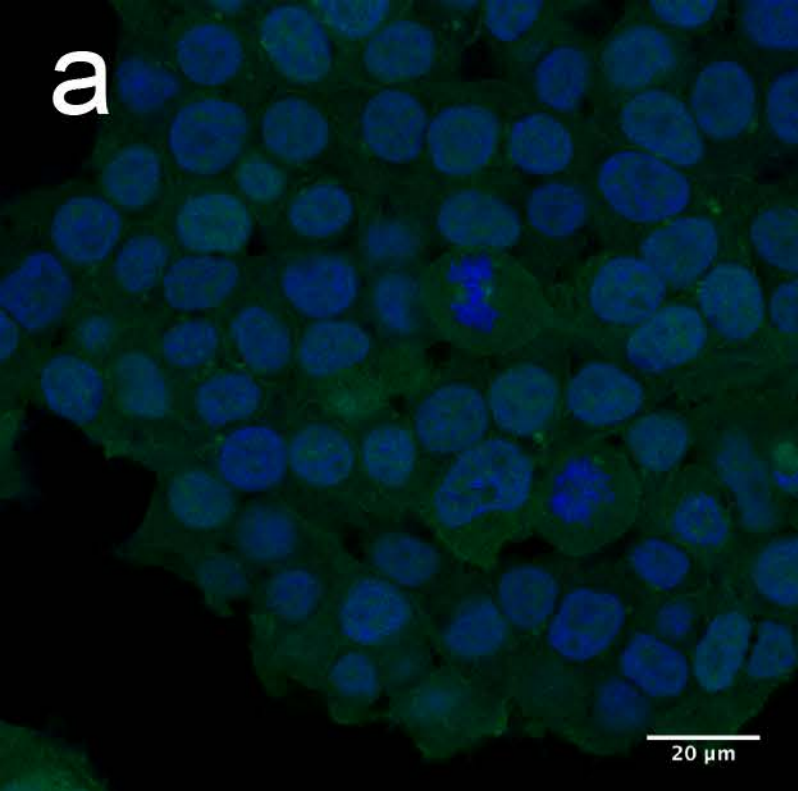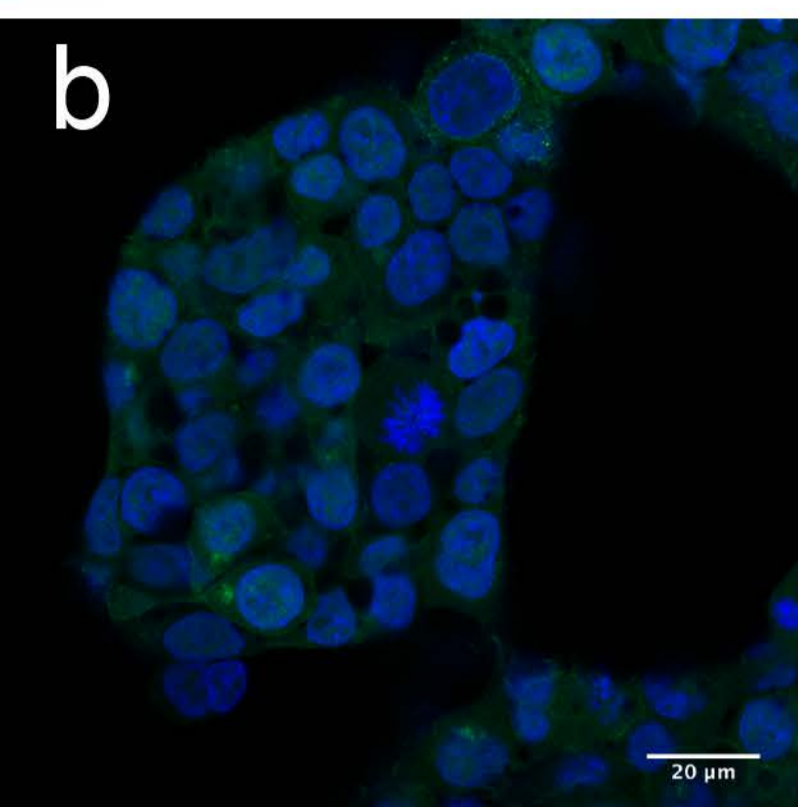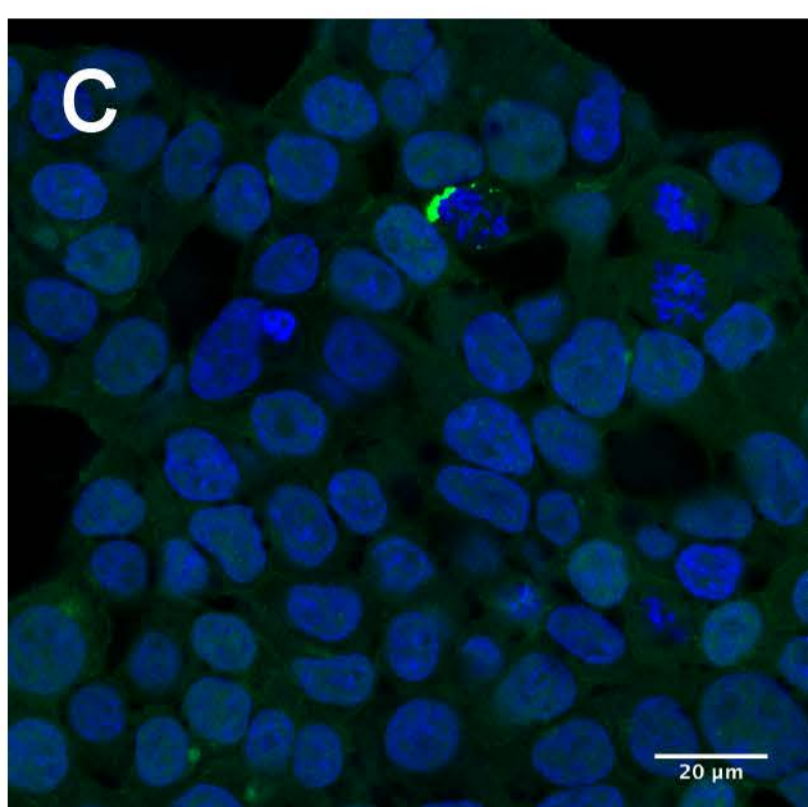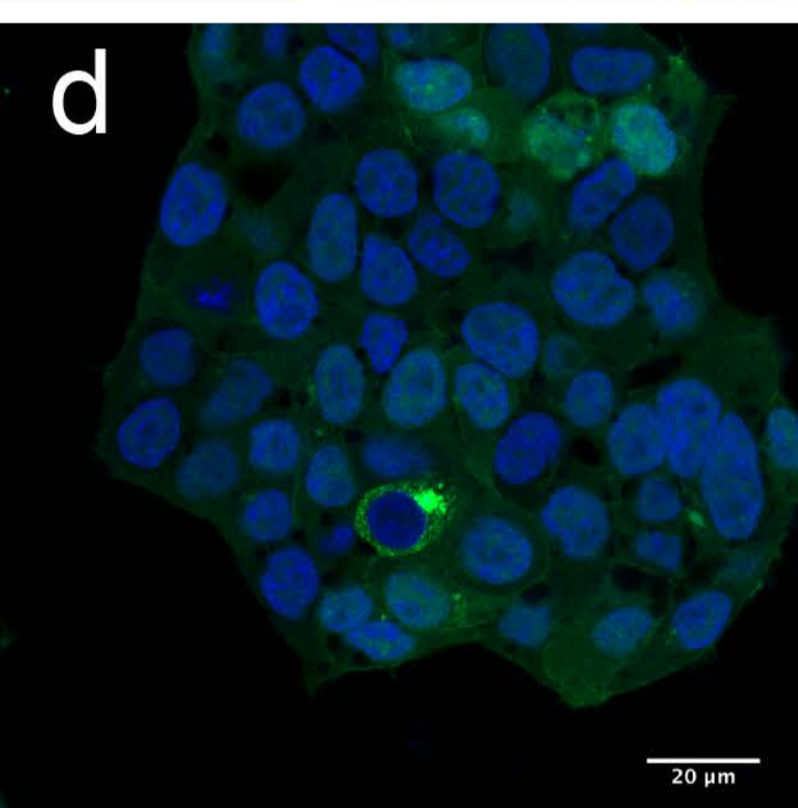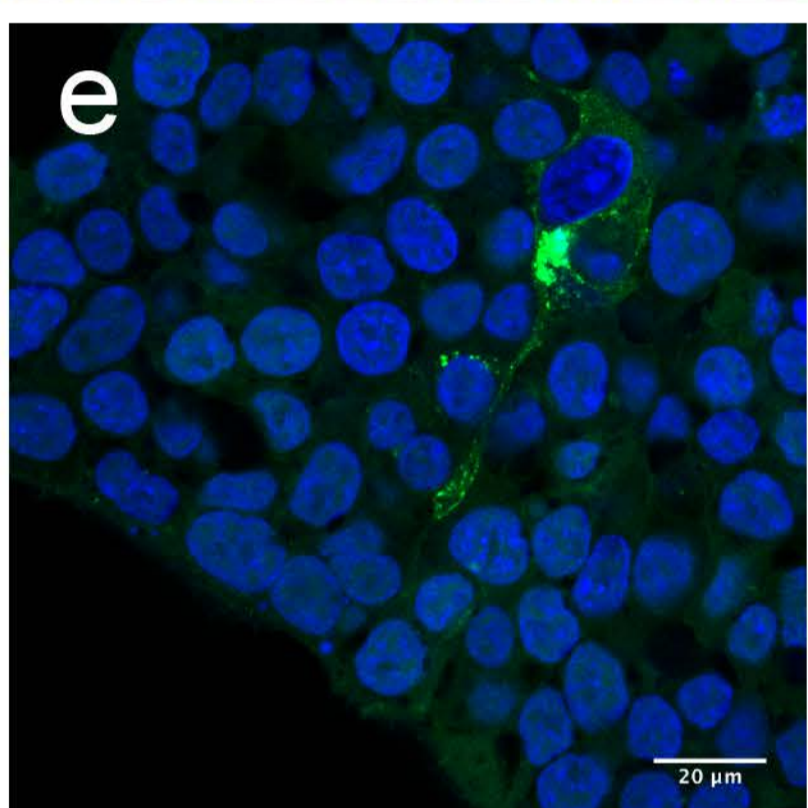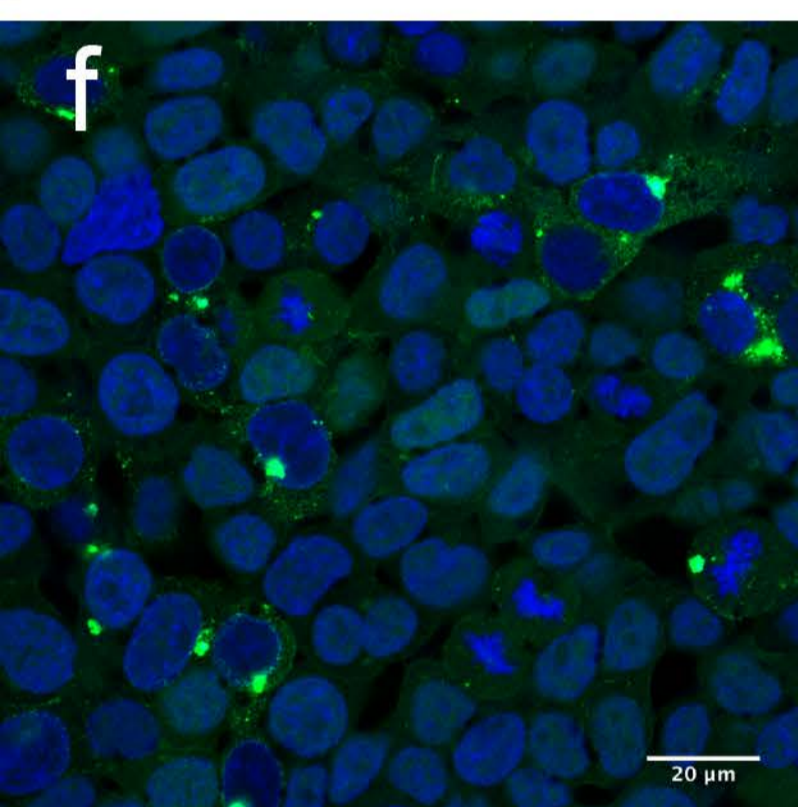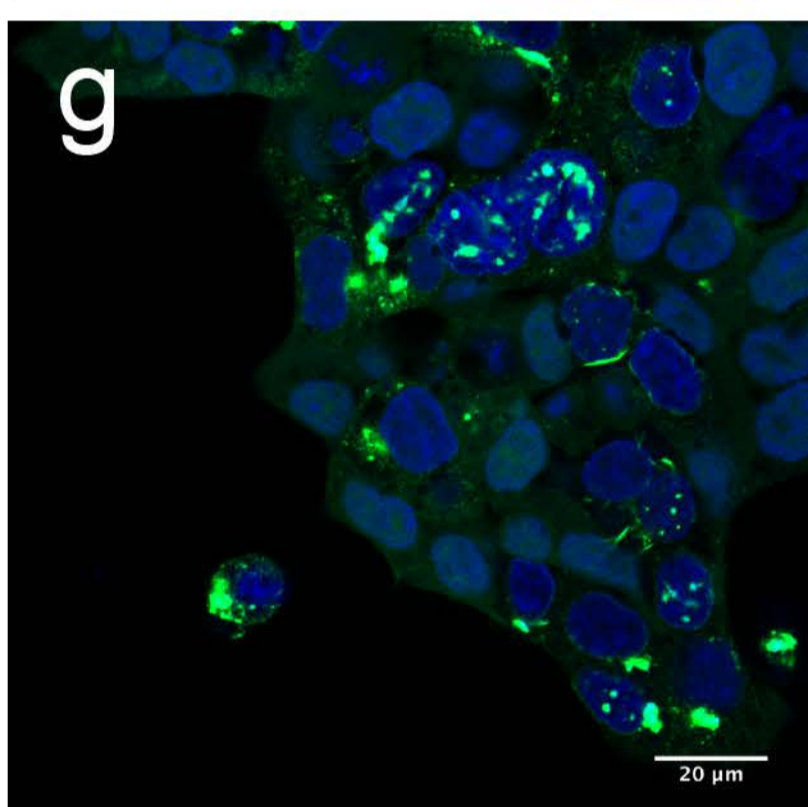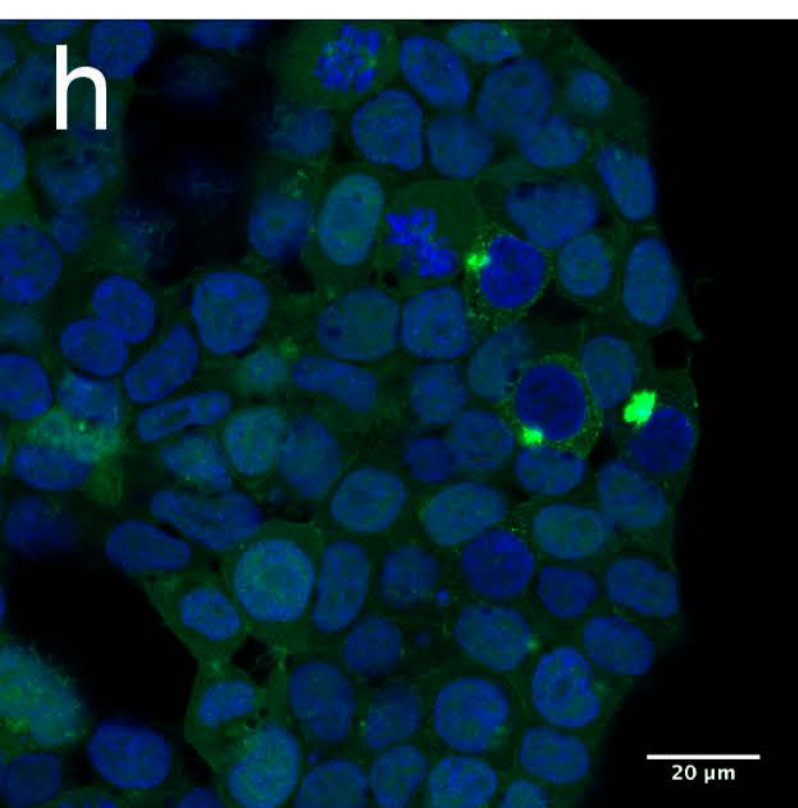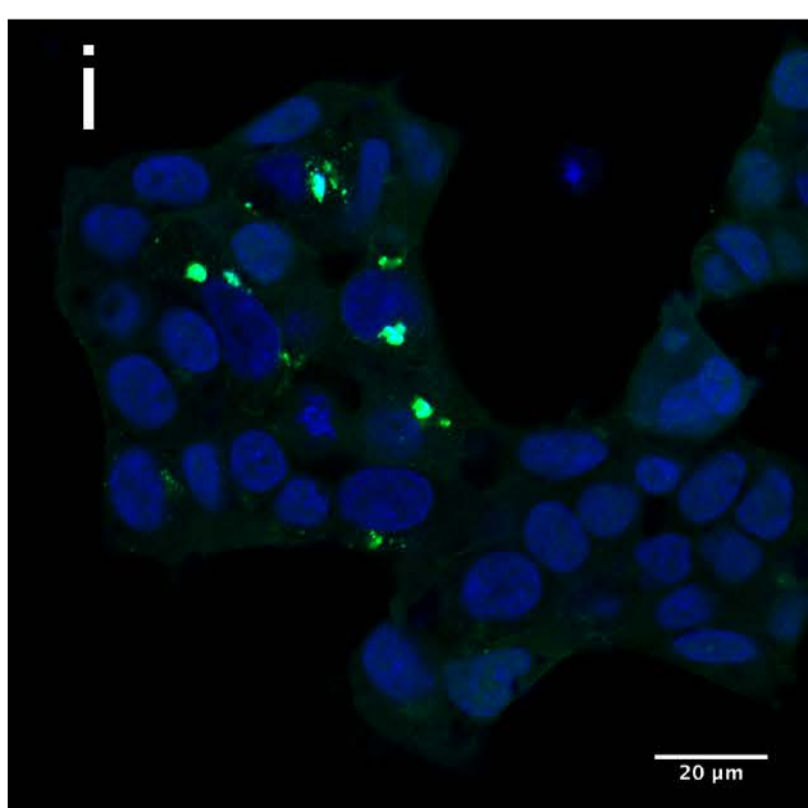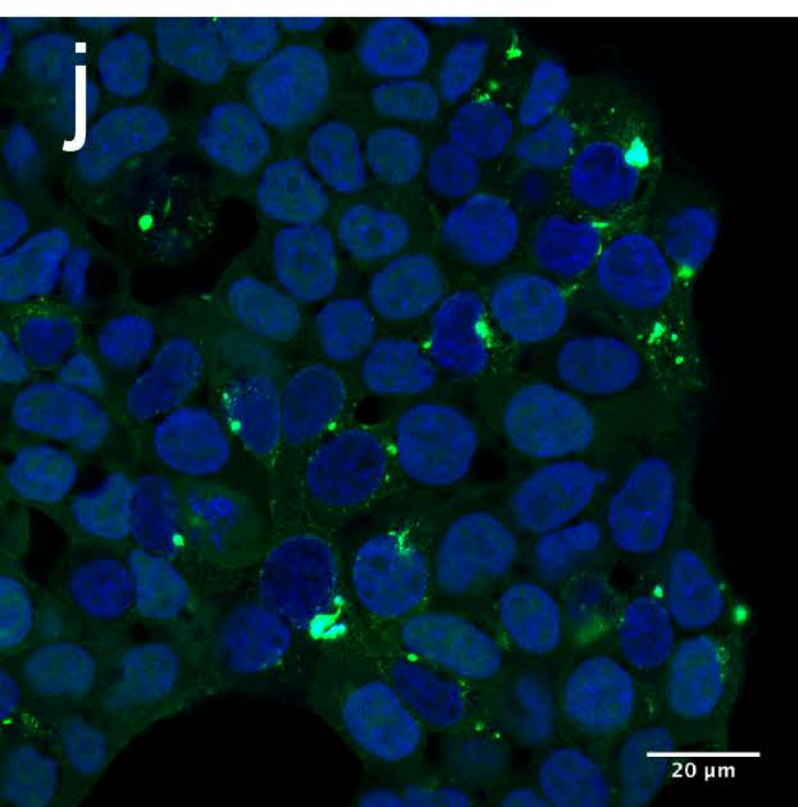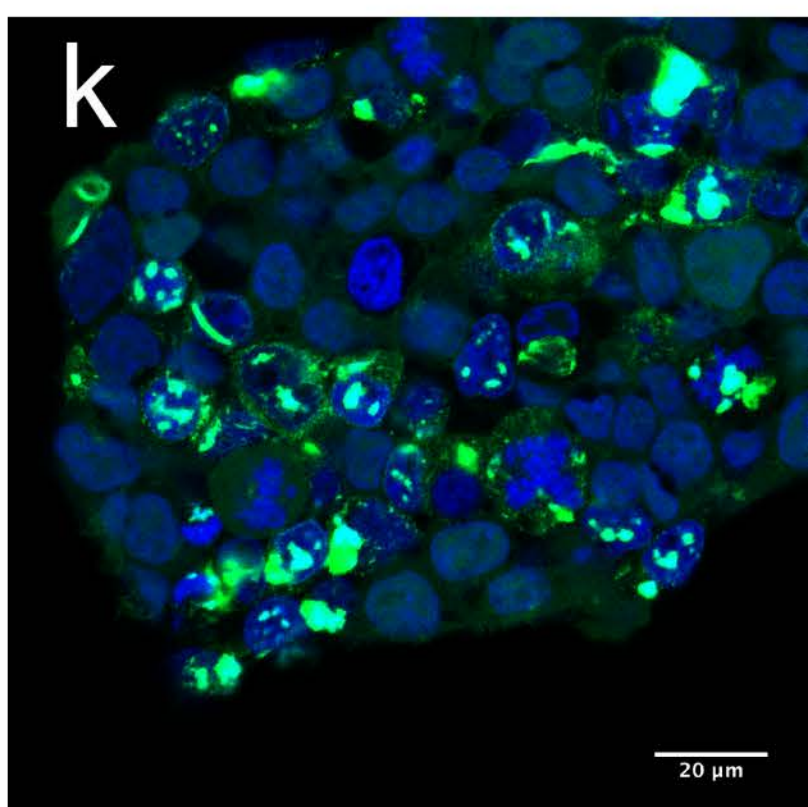

Supplement: NIHMS916392-supplement-2.pdf [file NIHMS916392-supplement-2.pdf]
